RESEARCH ARTICLE

# Cancer prevalence, incidence and mortality in people who experience incarceration in Ontario, Canada: A population-based retrospective cohort study

Fiona G. Kouyoumdjian<sup>1,2\*</sup>, Lucie Pivnick<sup>3</sup>, Kathryn E. McIsaac<sup>1,4</sup>, Andrew S. Wilton<sup>5</sup>, Aisha Lofters<sup>1,5,6</sup>, Stephen W. Hwang<sup>1,5</sup>

**1** Centre for Urban Health Solutions, St. Michael's Hospital, Toronto, Ontario, Canada, **2** Department of Family Medicine, McMaster University, Hamilton, Ontario, Canada, **3** Faculty of Medicine, McMaster University, Hamilton, Ontario, Canada, **4** Research Services, Nova Scotia Health Authority, Halifax, Nova Scotia, Canada, **5** Institute for Clinical Evaluative Sciences, Toronto, Ontario, Canada, **6** Department of Family and Community Medicine, St. Michael's Hospital, Toronto, Ontario, Canada

\* [kouyoumdjiaf@smh.ca](mailto:kouyoumdjiaf@smh.ca)

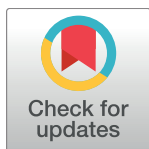

**OPEN ACCESS**

**Citation:** Kouyoumdjian FG, Pivnick L, McIsaac KE, Wilton AS, Lofters A, Hwang SW (2017) Cancer prevalence, incidence and mortality in people who experience incarceration in Ontario, Canada: A population-based retrospective cohort study. *PLoS ONE* 12(2): e0171131. doi:10.1371/journal.pone.0171131

**Editor:** Hajo Zeeb, Leibniz Institute for Prevention Research and Epidemiology BIPS, GERMANY

**Received:** September 29, 2016

**Accepted:** January 16, 2017

**Published:** February 22, 2017

**Copyright:** © 2017 Kouyoumdjian et al. This is an open access article distributed under the terms of the [Creative Commons Attribution License](https://creativecommons.org/licenses/by/4.0/), which permits unrestricted use, distribution, and reproduction in any medium, provided the original author and source are credited.

**Data Availability Statement:** The authors are prohibited from sharing data as per their legal Research Agreement with the Ontario Ministry of Community Safety and Correctional Services. Interested persons would need permission from the Ministry to access the data and any such request could be made to Michael Kirk at [michael.kirk@ontario.ca](mailto:michael.kirk@ontario.ca).

**Funding:** This study was funded by a 2013 University of Toronto Postgraduate Research

## Abstract

### Introduction

Evidence suggests that many risk factors for cancer are overrepresented in people who experience incarceration, and data on cancer epidemiology are limited for this population. We aimed to describe cancer prevalence, incidence and mortality in adults admitted to provincial custody in Ontario, Canada in 2000.

### Methods

We linked data on 48,166 adults admitted to provincial custody in Ontario in 2000 with Ontario Cancer Registry data to 2012. We calculated cancer prevalence in the 10 years prior to admission to custody in 2000, incidence between 2000 and 2012 and mortality between 2000 and 2011. Standardized for age, we calculated incidence and mortality ratios by sex compared to the general population of Ontario.

### Results

The 10-year cancer prevalence was 0.4% in men and 0.6% in women at admission to provincial custody in 2000. Between 2000 and 2012, 2.6% of men and 2.8% of women were diagnosed with new cancer. The standardized incidence ratio for cancer was 1.0 (95% CI 0.9–1.0) for men and 0.9 (95% CI 0.7–1.0) for women compared to the general population, and was significantly increased for cervical, head and neck, liver and lung cancers. The standardized mortality ratio was 1.6 (95% CI 1.4–1.7) in men and 1.4 (95% CI 1.0–1.9) in women, and was significantly increased for head and neck, liver, and lung cancers.

Award to FK. This funder had no role in the study design, data collection and analysis, decision to publish, or preparation of the manuscript.

**Competing Interests:** The authors have declared that no competing interests exist.

## Conclusions

There is an excess burden of cancer in people who experience incarceration. Cancer prevention should include people who experience incarceration, and the period of incarceration may offer an opportunity for intervention.

## Introduction

An estimated 11 million people are imprisoned worldwide at any given time [1]. In Canada, there are over 250,000 adult admissions each year to correctional facilities and about 40,000 people in correctional facilities each day [2–4].

People who experience incarceration in Canada and internationally have worse health than the general population across a range of indicators [5, 6]. The epidemiology of cancer in this population has not been well characterized, despite evidence indicating the overrepresentation of risk factors in prisoners for cancer incidence and progression [5, 6]. Specific data on prisoners in Canada reveal a high prevalence of current smoking [7, 8], alcohol use [9–11], and infections such as hepatitis B virus (HBV) [12–14], hepatitis C virus (HCV) [15, 16] and human immunodeficiency virus (HIV) [15, 17].

Data on cancer prevalence in prisoners may elucidate health care needs in custody and inform health care service planning in custody and at release. The self-reported lifetime prevalence of any cancer was 5% in men and 15% in women prisoners in New South Wales, Australia in 2001 [18] and 1.1% in men and 8.3% in women in local jails in the USA in 2002 [19]. The prevalence of current cancer was 1.3% in White men and 0.4% in Black men in the US 2004 Survey of Inmates in State Correctional Facilities [20], and 0.8% in men and 2.7% in women in maximum security facilities in New York State between 2009 and 2011 [21]. Based on US national survey data from 2002 to 2004, there was no significant difference in the self-reported prevalence of any cancer in people in jails or prisons compared to non-institutionalized adults after adjusting for age and sex [22]. Looking at specific cancers, however, this analysis identified that cervical cancer was significantly more common in women in jails or prisons compared to non-institutionalized women [22], which is consistent with the high prevalence of cervical cancer found in other studies of incarcerated women [23–29]. One study found a high prevalence of oral cancer in incarcerated men in Maharashtra, India [30].

Less is known about cancer incidence in people who experience incarceration, and most studies have been limited by a lack of data on persons at risk and person-time at risk [31–33]. One exception is a study of persons incarcerated in prisons in the state of Georgia in 1991 who were still alive in 1998, which found incidence rates per 1,000 person years of 3.1 for any cancer, 0.01 for cervical cancer, 0.1 for liver cancer, 0.8 for lung and bronchus cancer, 0.6 for prostate cancer, 0.32 for colorectal cancer, and 0.1 for kidney cancer [34]. Adjusted for age, race, sex, and year of diagnosis and compared to the general population, the standardized incidence ratio (SIR) for any cancer was significantly increased at 2.3 [34].

Regarding cancer mortality, several large US cohort studies have identified an increased standardized mortality ratio (SMR) due to cancer in people who experience incarceration compared to the general population after controlling for age, sex, and race, with SMRs of 1.2 to 1.9 [35–37]. This finding is consistent with results from a study by our research group in Ontario, Canada that found an SMR for cancer of 1.6 after controlling for age [38]. Other US data suggest that race may modify the effect of a history of incarceration on cancer mortality, with significantly increased SMRs for White men and significantly decreased SMRs for Black

men incarcerated in North Carolina, which the authors suggest could be due to poor health-care access in non-incarcerated Black men [39, 40]. In the study of persons in prison in Georgia in 1991 who were still alive in 1998, the SMR for any cancer was not increased, at 1.0 [34]. SMRs tend to be increased for liver cancer [39–41] and lung or bronchial cancer [39, 40], with differences in SMRs potentially attributable to the aforementioned effect modification by race [39, 40].

In summary, comparing prisoners with the general population, the prevalence of any cancer is similar and the prevalence of cervical cancer is high, the SMR for any cancer varies with evidence of effect modification by race and the SMR for some specific cancer sites tends to be high. Incidence data are limited and suggest that incidence of any cancer is high compared with the general population. However, the use of self-reported data for determining prevalence may limit internal validity [42], the lack of data on the full population of people who experience incarceration [34] and of appropriate denominators for incidence rates [31–33] limits the generalizability of incidence data, and the lack of incidence and mortality data for specific types of cancer precludes the implementation of measures to improve cancer morbidity and mortality in this population.

We aimed to describe cancer prevalence, incidence and mortality in people admitted to provincial custody in Ontario, Canada in 2000, and to compare cancer incidence and mortality between those admitted to provincial custody in 2000 and the general population.

## Methods

### Study cohort

We defined cohort members as all men and women admitted to provincial correctional facilities for adults in Ontario in 2000, whether remanded, *i.e.* admitted to custody but not yet sentenced, or incarcerated, *i.e.* sentenced; we use the term incarcerated in this paper to include both groups. We followed this cohort for incident cancer until December 31, 2012 and for death due to cancer until December 31, 2011 based on data that were available at the time of analysis. We were not able to identify people who moved out of Ontario during the period under study. During the period under study, there was no routine cancer screening program in place in provincial correctional facilities, but there was a routine clinical assessment by nursing staff at admission and by a physician within weeks of admission.

The Ontario Ministry of Community Safety and Correctional Services (MCSCS) provided demographic data, health card numbers, information on death while under supervision, and self-reported race. On each admission, correctional staff verified or requested a health card number from the Ontario Ministry of Health and Long-Term Care, for the purposes of physician billings and other health care use. Persons who were eligible for health care coverage (*i.e.* residents of the province) who did not have a valid health card number were provided with a temporary number while in custody.

### Data transfer and linkage

The MCSCS transferred data on 49,470 persons admitted to custody in 2000 to the Institute for Clinical Evaluative Sciences, an independent, nonprofit organization funded by the Ontario Ministry of Health and Long-Term Care. We linked eligible persons in the MCSCS data set to people in the Registered Persons Database, which is a roster of all people eligible for the Ontario Health Insurance Plan. For persons with a health card number provided by the MCSCS ( $N = 40,593$ ), we used deterministic linkage by health card number. For persons with no health card number provided by the MCSCS, we used a validated algorithm for probabilistic linkage using name (or names for persons with multiple names or aliases), sex and date of

birth, and staff conducted clerical review of matches as needed [43]. As explained in detail elsewhere [38], we excluded matches that were likely inaccurate ( $n = 208$ ), for example when the sex was different in the MCSCS data and Registered Persons Database, or if there were data indicating health care use or incarceration after the identified date of death.

Through the Registered Persons Database, we accessed a unique encrypted health card number (IKN), which was used to identify individuals across health care databases. We used the IKN to access data on cancer from the Ontario Cancer Registry, which contains data on newly diagnosed cases of cancer (except non-melanoma skin cancer) and deaths due to cancer for residents of Ontario. Cancers were classified according to the International Classification of Diseases for Oncology, 3<sup>rd</sup> edition, ICD-O-3 [44]. We obtained data on specific types of cancer based on hypotheses regarding increased risk in the incarcerated cohort and the most common cancers in the Canadian population [45] and using the following ICD-O-3 codes: breast (C50), cervical (C53), colorectal (C18-20), head and neck (C00-C14), liver (C22), lung (C34) and prostate (C61).

## General population comparator data

We accessed publicly available data from Statistics Canada [46] on incidence and mortality in 2006, as the midpoint of the follow up period. We accessed data on incident cases for Ontario (Table 103–0550) and data on deaths for Canada (Table 102–0522) since age stratum-specific data on mortality due to cancer were not available for Ontario, and data on population sizes for Ontario and Canada (Table 051–0001) [46].

## Analysis

For any cancer and specific cancers, we calculated the cancer prevalence as the number of cases in persons in the ten, five, and two years preceding initial admission to custody in 2000 divided by the total number of persons admitted to custody. For the cancer incidence rate, we divided the number of cases of new primary cancers diagnosed between the date of admission to custody in 2000 and December 31, 2012, by the person years at risk of incident cancer, which we defined as the difference between the date of admission to custody in 2000 and December 31, 2012, death, or the diagnosis of primary cancer (whichever occurred first), and we excluded persons with the same type of cancer in the ten years before admission to custody ( $N = 1$ ). For the cancer mortality rate, we divided the number of deaths due to cancer between the date of admission to custody in 2000 and December 31, 2011 by the person years at risk of death, defined as the difference between the date of admission to custody in 2000 and December 31, 2011 or death (whichever occurred first). The risk period for death was censored at the end of 2011 because that was the most recent date for which cause of death was available in the Ontario Cancer Registry at the time of the analysis.

We used indirect standardization to adjust for age in calculating standardized incidence and mortality ratios compared to the general population [47], and we calculated confidence intervals assuming a Poisson distribution.

Analyses were performed using SAS version 9.4 and Stata version 12.

The study was approved by the Ministry of Community Safety and Correctional Services Research Committee and by the St. Michael's Hospital Research Ethics Board. Consistent with Article 5.5A of the Canadian Tri-Council Policy regarding the secondary use of data [48], no written or verbal consent was obtained from participants for the secondary use of these data and this was approved by the St. Michael's Hospital Research Ethics Board.

**Table 1. Characteristics of persons admitted to provincial custody in Ontario in 2000, N = 48,166, by sex.**

|                                            |                     | Men, N = 43,419 |      | Women, N = 4,747 |      |
|--------------------------------------------|---------------------|-----------------|------|------------------|------|
|                                            |                     | n               | %    | n                | %    |
| Age at baseline                            | 15–19               | 4,054           | 9.3  | 411              | 8.7  |
|                                            | 20–29               | 14,606          | 33.6 | 1,436            | 30.3 |
|                                            | 30–39               | 13,878          | 32.0 | 1,779            | 37.5 |
|                                            | 40–49               | 7,814           | 18.0 | 873              | 18.4 |
|                                            | 50–59               | 2,336           | 5.4  | 191              | 4.0  |
|                                            | 60+                 | 731             | 1.7  | 58               | 1.2  |
| Self-reported race at baseline             | Aboriginal          | 3,005           | 6.9  | 460              | 9.7  |
|                                            | Black               | 5,374           | 12.4 | 596              | 12.6 |
|                                            | East Asian          | 545             | 1.3  | 35               | 0.7  |
|                                            | Hispanic            | 392             | 0.9  | 28               | 0.6  |
|                                            | South Asian         | 897             | 2.1  | 54               | 1.1  |
|                                            | South East Asian    | 725             | 1.7  | 70               | 1.5  |
|                                            | West Asian/Arab     | 572             | 1.3  | 26               | 0.5  |
|                                            | White               | 29,977          | 69.0 | 3,279            | 69.1 |
|                                            | Other*              | 1,932           | 4.4  | 199              | 4.2  |
| Neighbourhood income quintile at baseline  | missing             | 7,862           | 18.1 | 910              | 19.2 |
|                                            | 1 (lowest)          | 13,336          | 30.7 | 1,693            | 35.7 |
|                                            | 2                   | 8,381           | 19.3 | 858              | 18.1 |
|                                            | 3                   | 5,892           | 13.6 | 573              | 12.1 |
|                                            | 4                   | 4,674           | 10.8 | 393              | 8.3  |
|                                            | 5 (highest)         | 3,274           | 7.5  | 320              | 6.7  |
| Admissions to provincial custody 2000–2012 | 1                   | 14,238          | 32.8 | 1,885            | 39.7 |
|                                            | 2–4                 | 14,678          | 33.8 | 1,392            | 29.3 |
|                                            | 5+                  | 14,503          | 33.4 | 1,470            | 31.0 |
| Transferred to federal facility 2000–2012  | no                  | 38,680          | 89.1 | 4,480            | 94.4 |
|                                            | yes                 | 4,739           | 10.9 | 267              | 5.6  |
| Length of index incarceration in 2000      | <1 month            | 28,062          | 64.6 | 3,792            | 79.9 |
|                                            | 1 month- <3 months  | 8,133           | 18.7 | 596              | 12.6 |
|                                            | 3 months- <6 months | 4,439           | 10.2 | 239              | 5.0  |
|                                            | 6 months- <1 year   | 1,981           | 4.6  | 95               | 2.0  |
|                                            | ≥1 year             | 804             | 1.9  | 25               | 0.5  |
| Total time in provincial custody 2000–2012 | <1 month            | 13,682          | 31.5 | 2,221            | 46.8 |
|                                            | 1 month- <3 months  | 6,971           | 16.1 | 787              | 16.6 |
|                                            | 3 months- <6 months | 6,072           | 14.0 | 628              | 13.2 |
|                                            | 6 months- <1 year   | 6,132           | 14.1 | 534              | 11.2 |
|                                            | ≥1 year             | 10,562          | 24.3 | 577              | 12.1 |

\*Includes other self-reported race, unknown, or refused.

doi:10.1371/journal.pone.0171131.t001

## Results

Of the 49,470 persons admitted to adult provincial correctional facilities in Ontario in 2000, we linked 48,166 persons (97.4%) with health administrative data, as explained in detail elsewhere [38]. Characteristics of the study sample are shown in Table 1.

At the time of admission to custody in 2000, the 10-year cancer prevalence was 0.4% in men and 0.6% in women, with specific cancer sites shown in Table 2. Of the 190 people who were admitted to custody with prevalent cancer, 36.8% had been diagnosed with cancer within

**Table 2. Cancer prevalence in persons admitted to provincial custody in Ontario in 2000, by sex and primary cancer site.**

| Cancer site   | Men N = 43,419, n (%) |           |           | Women N = 4,747, n (%) |            |            |
|---------------|-----------------------|-----------|-----------|------------------------|------------|------------|
|               | 10-year               | 5-year    | 2-year    | 10-year                | 5-year     | 2-year     |
| All           | 160 (0.4)             | 110 (0.3) | 61 (0.1)  | 30 (0.6)               | 22 (0.5)   | 9 (0.2)    |
| Breast        | -                     | -         | -         | 7 (0.1)                | 6 (0.1)    | ≤5* (≤0.1) |
| Cervical      | -                     | -         | -         | 8 (0.2)                | 0 (0.0)    | 0 (0.0)    |
| Colorectal    | 13 (0.0)              | 9 (0.0)   | 5 (0.0)   | ≤5* (≤0.1)             | ≤5* (≤0.1) | ≤5* (≤0.1) |
| Head and neck | 12 (0.0)              | 7 (0.0)   | 3 (0.0)   | 0 (0.0)                | 0 (0.0)    | 0 (0.0)    |
| Liver         | ≤5* (0.0)             | ≤5* (0.0) | ≤5* (0.0) | 0 (0.0)                | 0 (0.0)    | 0 (0.0)    |
| Lung          | 8 (0.0)               | ≤5* (0.0) | ≤5* (0.0) | 0 (0.0)                | 0 (0.0)    | 0 (0.0)    |
| Prostate      | 24 (0.1)              | 19 (0.0)  | 10 (0.0)  | -                      | -          | -          |
| Other         | 104 (0.2)             | 70 (0.2)  | 32 (0.1)  | 14 (0.3)               | 10 (0.2)   | ≤5* (≤0.1) |

\*To decrease the risk of identifying individuals, we indicated ≤5 as the number of people in cells in which there were 5 or fewer persons. For the percentage, we indicated the true percentage if the value didn't change for numerators between 1 and 5, or else we used 5 as the numerator and indicated the value as less than or equal to the result.

doi:10.1371/journal.pone.0171131.t002

two years of admission, 32.6% between two and five years of admission, and 30.5% between five and 10 years of admission.

Between 2000 and 2012, 2.6% of men and 2.8% of women were diagnosed with new primary cancers. As per Table 3, the most common types of incident cancer for men were lung, prostate, colorectal, and head and neck, while the most common types of cancer for women were breast, lung, and cervical.

The SIR for any cancer was 1.0 (95% CI 0.9–1.0) for men and 0.9 (95% CI 0.7–1.0) for women in the cohort compared to the general population. The SIR was higher in men for lung, liver, and head and neck cancers, and lower for prostate and colorectal cancers (Fig 1). For women, the SIR was higher for lung, cervical, and liver cancers, and lower for breast cancer.

**Table 3. Cancer incidence and mortality in persons admitted to provincial custody in Ontario in 2000,\* by sex and primary cancer site.**

| Cancer site   | Incidence 2000 to 2012, n (cases per 1,000 person years) |            | Deaths 2000 to 2011, n (deaths per 1,000 person years) |            |
|---------------|----------------------------------------------------------|------------|--------------------------------------------------------|------------|
|               | Men                                                      | Women      | Men                                                    | Women      |
| All           | 1141 (2.2)                                               | 135 (2.4)  | 491 (1.0)                                              | 42 (0.8)   |
| Breast        | -                                                        | 30 (0.5)   | -                                                      | 6 (0.1)    |
| Cervical      | -                                                        | 18 (0.3)   | -                                                      | ≤5† (≤0.1) |
| Colorectal    | 108 (0.2)                                                | 9 (0.2)    | 35 (0.1)                                               | 0 (0)      |
| Head and neck | 92 (0.2)                                                 | ≤5† (≤0.1) | 26 (0.1)                                               | ≤5† (≤0.1) |
| Liver         | 63 (0.1)                                                 | ≤5† (≤0.1) | 44 (0.1)                                               | ≤5† (≤0.1) |
| Lung          | 246 (0.5)                                                | 26 (0.5)   | 157 (0.3)                                              | 15 (0.3)   |
| Prostate      | 162 (0.3)                                                | -          | 9 (0.0)                                                | -          |
| Other         | 547 (0.9)                                                | 52 (0.9)   | 210 (0.4)                                              | 11 (0.2)   |

\*Total population is 43,419 men and 4,747 women.

†To decrease the risk of identifying individuals in cells in which there were 5 or fewer persons, we indicated ≤5 as the number of people and we used 5 as the numerator to calculate the percentage and indicated the value as less than or equal to the result.

doi:10.1371/journal.pone.0171131.t003

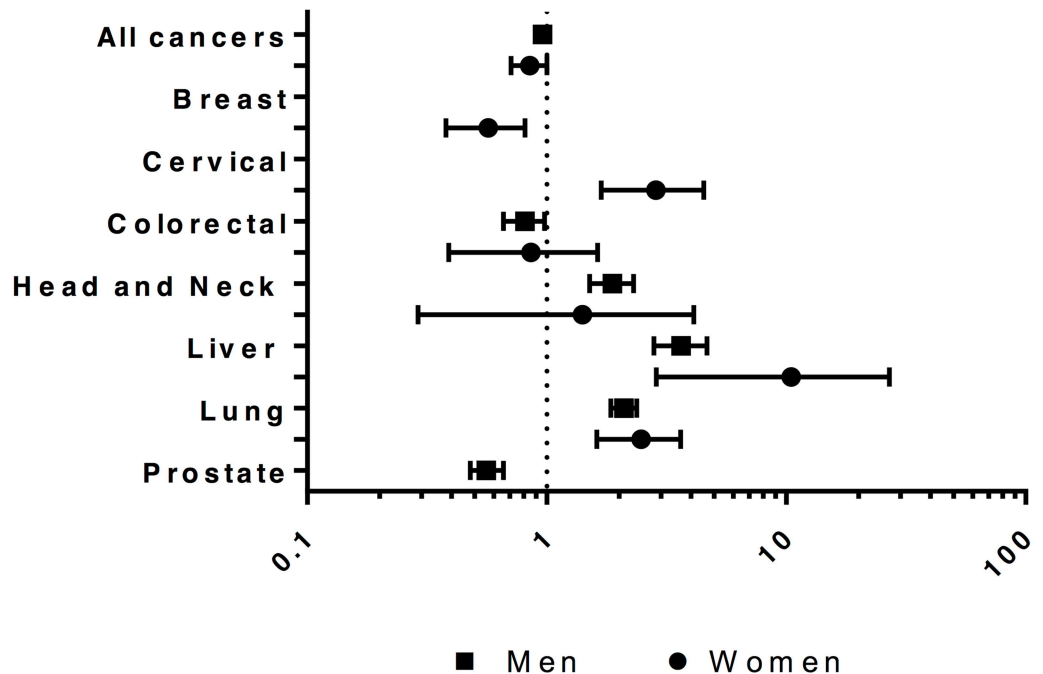

**Fig 1. Standardized\* incidence ratios for cancer for persons admitted to provincial custody in Ontario in 2000 compared to general population of Ontario in 2006, by sex and primary cancer site.** \*Standardized for age.

doi:10.1371/journal.pone.0171131.g001

For cancers for which the SIR was significantly increased for cohort members compared to the general population, the relative risk of cancer was increased across most age strata, though there were no cases in several age strata for specific types of cancer (S1 Appendix).

The overall cancer-specific mortality rate was 1.0 per 1,000 person-years for men and 0.8 per 1,000 person-years for women (Table 3). The SMR was 1.6 (95% CI 1.4–1.7) in men and 1.4 (95% CI 1.0–1.9) in women (Fig 2). The SMR was higher in men for any cancer, lung cancer, liver cancer, and head and neck cancer, and in women for lung, liver, and head and neck cancers, and the SMR was not lower for any type of cancer in men or women.

## Discussion

This study of men and women who experienced incarceration in Ontario reveals a 10-year cancer prevalence of 0.4% in men and 0.6% in women at the time of admission in 2000. Compared to the general population, the SIR for those who experienced incarceration was higher for lung, liver and head and neck cancers in men, higher for lung, cervical, and liver cancers in women, lower for prostate and colorectal cancers in men, and lower for breast cancer in women. The SMR was increased in men for any cancer, lung cancer, liver cancer, and head and neck cancer, and in women for lung, liver and head and neck cancers.

When comparing our prevalence findings with other studies, we note that the cancer prevalence in incarcerated persons in this study is lower than in previous studies [18–21]. This could reflect that we included only cancer diagnosed in the past 10 years instead of cancer ever [18, 19], the use of self-report [42] in other studies [18–21], differences in the distribution of age or other cancer risk factors leading to a true difference in prevalence, or differences in health care utilization or cancer diagnosis reporting leading to an apparent prevalence difference.

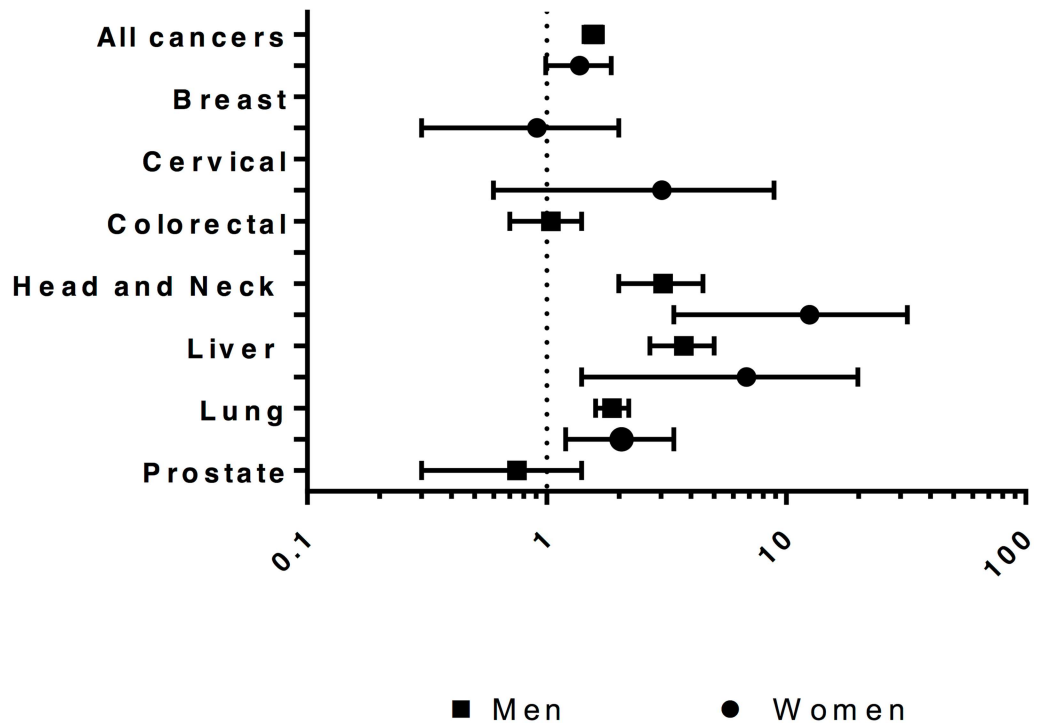

**Fig 2. Standardized\* mortality ratios† for cancer for persons admitted to provincial custody in Ontario in 2000 compared to general population of Canada in 2006, by sex and primary cancer site.** \*Standardized for age. †There were no deaths due to colorectal cancer in women in the cohort, and the SMR of 0 is not shown.

doi:10.1371/journal.pone.0171131.g002

Regarding mortality, the point estimates for the SMRs for any cancer in men and women were similar to those from most other studies [35–37], with the exception of the Georgia study in which the SMR due to any cancer was 1.0 [34]. This difference may be due to the exclusion in that study of those who died within eight years of the index incarceration [34]. Risk factors for death such as injection drug use, hepatitis C infection, and HIV infection are also on the causal pathway for some cancer types, and the high risk of death due to other causes such as homicide, HIV, accidental poisoning and transportation injuries would compete with cancer as a cause of death [37].

The SIRs for prostate and colorectal cancer in men and breast cancer in women with a history of incarceration were significantly decreased. Other than age, which was adjusted for in the calculation of these SIRs, many risk factors for these cancers are more common in people who experience incarceration, including smoking for colorectal cancer [49, 50], alcohol use for colorectal cancer and breast cancer [49–51] and Black race for prostate cancer [52]. Given this, we hypothesize that the relatively decreased incidence may be due in part to underdiagnosis. Further research to elucidate this issue would be valuable, including to examine participation in screening programs and access to health care for diagnosis.

People who experience incarceration bear a disproportionate burden of disease for cancer compared to the general population, in particular for lung, liver, head and neck and cervical cancers. As noted already, many carcinogens associated with these cancers [53] are overrepresented in this population, including tobacco use, alcohol use, HPV, HBV, HCV, and HIV [5, 6]. As the increased relative risk for these cancers is largely consistent across age strata, the high SIR does not reflect an age or cohort effect [47], and therefore, prevention efforts should



include all affected age groups. The period of incarceration offers a unique opportunity for prevention, which may be feasible since most cohort members spent a total of more than three months in provincial custody over the follow up period, and limited evidence suggests that prevention initiatives are desired by people in custody [54–56]. Strategies for cancer prevention that could be offered in prisons include HPV and HBV vaccination, smoking cessation treatment, pap screening, linkage with organized screening programs and HCV treatment, and the published literature reveals examples of evaluations of some of these efforts in specific jurisdictions [57–59].

Though prevalent cancer affects only 0.4% of men and 0.6% of women admitted to custody, the majority of these persons have been diagnosed with cancer within the past five years, during which time people with cancer are likely receiving treatment, recovering from treatment, and obtaining close follow up for recurrence and supportive care [45]. Correctional health care must be appropriately structured and resourced to manage and support these patients with significant illness, in collaboration with community partners.

This study has several strengths. The cohort is large and representative. We accessed data on all persons admitted to a provincial correctional facility in 2000, which includes those who were subsequently transferred to the federal system, *i.e.* those sentenced to two years or longer. We achieved a high rate of linkage with health administrative data [38]: 97.4%. We expect to have high case ascertainment since the Ontario Cancer Registry collects data on incident cancer cases in Ontario residents from multiple sources [60], and has been shown to have high completeness and validity [61].

There are potential limitations with respect to outcome ascertainment and the sample size. If people who experience incarceration access care less often than the general population and therefore are less likely to have existing cancer diagnosed, our SIRs would be biased toward the null or below one. We do not know whether people who experienced incarceration were more likely to move outside Ontario within the follow up period compared to the general population; if they were, the SIRs and also SMRs would similarly be biased toward the null or below one. Some of the analyses of outcomes in women were likely underpowered, for example the calculation of SMRs for specific cancer sites. This could be associated with Type II error if there were a true difference in mortality between women in the cohort and in the general population, therefore these results should be considered exploratory and interpreted with caution.

## Conclusions

People who experience incarceration are at an increased risk of developing and dying from certain types of cancer. Incarceration presents an opportunity for primary, secondary and tertiary prevention of cancer. We recommend further research to define access to prevention initiatives for this population while in custody and post-release, and knowledge translation efforts to ensure equitable access to and appropriate implementation and evaluation of such programs.

## Supporting information

**S1 Appendix. Relative risk of incident cancer 2000 to 2012 in persons admitted to provincial correctional facilities in Ontario in 2000 compared to the general population in Ontario in 2006, by age stratum, gender, and cancer type.**

(DOCX)

## Acknowledgments

We would like to acknowledge Kathy Underhill in the Ontario Ministry of Community Safety and Correctional Services and Alexander Kopp and Alejandro Gonzalez at the Institute for Clinical Evaluative Sciences.

## Author Contributions

**Conceptualization:** FGK LP KEM ASW AL SWH.

**Formal analysis:** ASW FGK LP.

**Funding acquisition:** FGK.

**Methodology:** FGK LP KEM ASW AL SWH.

**Software:** ASW FGK LP.

**Supervision:** SWH.

**Validation:** FGK LP.

**Visualization:** FGK LP KEM ASW AL SWH.

**Writing – original draft:** FGK.

**Writing – review & editing:** FGK LP KEM ASW AL SWH.

## References

1. Walmsley R. World prison population list, 11th edition. King's College London International Centre for Prison Studies, 2016.
2. Statistics Canada. CANSIM Table 251–0005: Adult correctional services, average counts of offenders in provincial and territorial programs: Annual 2014 [cited 2014 September 22]. <http://www5.statcan.gc.ca/cansim/>.
3. Statistics Canada. CANSIM Table 251–0006: Adult correctional services, average counts of offenders in federal programs: Annual 2014 [cited 2014 September 22]. <http://www5.statcan.gc.ca/cansim/>.
4. Statistics Canada. Youth correctional services, average counts of young persons in provincial and territorial correctional services: Annual (persons) 2014 [cited 2014 September 22]. <http://www5.statcan.gc.ca/cansim/>.
5. Fazel S, Baillargeon J. The health of prisoners. *Lancet*. 2011; 377(9769):956–65. Epub 2010/11/26. doi: [10.1016/S0140-6736\(10\)61053-7](https://doi.org/10.1016/S0140-6736(10)61053-7) PMID: [21093904](https://pubmed.ncbi.nlm.nih.gov/21093904/)
6. Kouyoumdjian F, Schuler A, Hwang SW, Matheson FI. The health status of prisoners in Canada: A narrative review. *Canadian Family Physician*. 2016; 62(3):215–22. PMID: [27427562](https://pubmed.ncbi.nlm.nih.gov/27427562/)
7. Lasnier B, Cantinotti M, Guyon L, Royer A, Brochu S, Chayer L. Implementing an indoor smoking ban in prison: Enforcement issues and effects on tobacco use, exposure to second-hand smoke and health of inmates. *Canadian Journal of Public Health*. 2011; 102(4):249–53. PMID: [21913577](https://pubmed.ncbi.nlm.nih.gov/21913577/)
8. Robinson D, Mirabelli, L. Summary of Findings of the 1995 CSC National Inmate Survey Ottawa, Canada 1996 [cited 2014 November 18]. <http://www.csc-scc.gc.ca/research/b14e-eng.shtml>.
9. Bell A, Trevethan S, Allegri N. A Needs Assessment of Federal Aboriginal Women Offenders. In: Correctional Service of Canada, editor. Ottawa 2004.
10. Brochu S, Guyon L, Desjardins L. Comparative profiles of addicted adult populations in rehabilitation and correctional services. *Journal of substance abuse treatment*. 1999; 16(2):173–82. PMID: [10023617](https://pubmed.ncbi.nlm.nih.gov/10023617/)
11. Smith A, Cox K, Poon C, Stewart D, McCreary Centre Society. Time Out III: A profile of BC youth in custody. Vancouver, BC: McCreary Centre Society; 2013 [cited 2014 December 1]. [http://www.mcs.bc.ca/pdf/Time\\_Out\\_III.pdf](http://www.mcs.bc.ca/pdf/Time_Out_III.pdf).
12. Ford PM, White C, Kaufmann H, MacTavish J, Pearson M, Ford S, et al. Seroprevalence of hepatitis C in a Canadian federal penitentiary for women. *Canada communicable disease report = Releve des maladies transmissibles au Canada*. 1995; 21(14):132–4. PMID: [7670432](https://pubmed.ncbi.nlm.nih.gov/7670432/)

13. Correctional Service Canada. Infectious Disease Surveillance in Canadian Federal Penitentiaries 2007–2008: Pre-Release Report. In: Correctional Service Canada, editor. 2012.
14. Kouyoumdjian FG, Main C, Calzavara LM, Kiefer L. Prevalence and predictors of urethral chlamydia and gonorrhea infection in male inmates in an Ontario correctional facility. *Canadian Journal of Public Health/Revue Canadienne de Sante Publique*. 2011; 102(3):220–4.
15. Calzavara L, Ramuscak N, Burchell AN, Swantee C, Myers T, Ford P, et al. Prevalence of HIV and hepatitis C virus infections among inmates of Ontario remand facilities. *Canadian Medical Association journal*. 2007; 177(3):257–61. doi: [10.1503/cmaj.060416](https://doi.org/10.1503/cmaj.060416) PMID: [17664449](https://pubmed.ncbi.nlm.nih.gov/17664449/)
16. Correctional Service Canada. Infectious Disease Surveillance 2014 Hepatitis C Virus (HCV) 2016 [cited 2016 December 23]. <http://www.csc-scc.gc.ca/publications/005007-3038-eng.shtml>.
17. Correctional Service Canada. Human Immunodeficiency Virus (HIV) Age, Gender and Indigenous Ancestry 2016 [cited 2016 December 23]. <http://www.csc-scc.gc.ca/publications/005007-3034-eng.shtml>.
18. Butler T, Kariminia A, Levy M, Murphy M. The self-reported health status of prisoners in New South Wales. *Australian and New Zealand journal of public health*. 2004; 28(4):344–50. PMID: [15704699](https://pubmed.ncbi.nlm.nih.gov/15704699/)
19. Maruschak LM. Medical Problems of Jail Inmates. In: Bureau of Justice Statistics, editor. 2006.
20. Rosen DL, Hammond WP, Wohl DA, Golin CE. Disease prevalence and use of health care among a national sample of black and white male state prisoners. *Journal of health care for the poor and underserved*. 2012; 23(1):254–72. doi: [10.1353/hpu.2012.0033](https://doi.org/10.1353/hpu.2012.0033) PMID: [22643475](https://pubmed.ncbi.nlm.nih.gov/22643475/)
21. Bai JR, Befus M, Mukherjee DV, Lowy FD, Larson EL. Prevalence and Predictors of Chronic Health Conditions of Inmates Newly Admitted to Maximum Security Prisons. *Journal of correctional health care: the official journal of the National Commission on Correctional Health Care*. 2015; 21(3):255–64.
22. Binswanger IA, Krueger PM, Steiner JF. Prevalence of chronic medical conditions among jail and prison inmates in the USA compared with the general population. *Journal of epidemiology and community health*. 2009; 63(11):912–9. doi: [10.1136/jech.2009.090662](https://doi.org/10.1136/jech.2009.090662) PMID: [19648129](https://pubmed.ncbi.nlm.nih.gov/19648129/)
23. Martin RE. A review of a prison cervical cancer screening program in British Columbia. *Canadian journal of public health = Revue canadienne de sante publique*. 1998; 89(6):382–6. PMID: [9926496](https://pubmed.ncbi.nlm.nih.gov/9926496/)
24. Pereyra AJ. The relationship of sexual activity to cervical cancer. *Cancer of the cervix in a prison population. Obstetrics and gynecology*. 1961; 17:154–9. PMID: [13734313](https://pubmed.ncbi.nlm.nih.gov/13734313/)
25. Moghissi KS, Mack HC. Epidemiology of cervical cancer: study of a prison population. *American journal of obstetrics and gynecology*. 1968; 100(5):607–14. PMID: [5638481](https://pubmed.ncbi.nlm.nih.gov/5638481/)
26. Audet-Lapointe P. Detection of cervical cancer in a women's prison. *Canadian Medical Association journal*. 1971; 104(6):509–11. PMID: [5549991](https://pubmed.ncbi.nlm.nih.gov/5549991/)
27. Lessa PR, Ribeiro SG, Lima DJ, Nicolau AI, Damasceno AK, Pinheiro AK. Presence of high-grade intraepithelial lesions among women deprived of their liberty: a documental study. *Revista latino-americana de enfermagem*. 2012; 20(2):354–61. PMID: [22699737](https://pubmed.ncbi.nlm.nih.gov/22699737/)
28. de Sanjose S, Valls I, Paz Canadas M, Lloveras B, Quintana MJ, Shah KV, et al. [Human papillomavirus and human immunodeficiency virus infections as risk factors for cervix cancer in women prisoners]. *Medicina clinica*. 2000; 115(3):81–4. PMID: [10965480](https://pubmed.ncbi.nlm.nih.gov/10965480/)
29. Gonzalez C, Canals J, Ortiz M, Munoz L, Torres M, Garcia-Saiz A, et al. Prevalence and determinants of high-risk human papillomavirus (HPV) infection and cervical cytological abnormalities in imprisoned women. *Epidemiology and infection*. 2008; 136(2):215–21. doi: [10.1017/S0950268807008382](https://doi.org/10.1017/S0950268807008382) PMID: [17445312](https://pubmed.ncbi.nlm.nih.gov/17445312/)
30. Chaudhari A, Hegde-Shetiya S, Shirahatti R, Agrawal D. Comparison of different screening methods in estimating the prevalence of precancer and cancer amongst male inmates of a jail in maharashtra, India. *Asian Pacific journal of cancer prevention: APJCP*. 2013; 14(2):859–64. PMID: [23621252](https://pubmed.ncbi.nlm.nih.gov/23621252/)
31. Davies EA, Sehgal A, Linklater KM, Heaps K, Moren C, Walford C, et al. Cancer in the London prison population, 1986–2005. *Journal of public health*. 2010; 32(4):526–31. doi: [10.1093/pubmed/fdq009](https://doi.org/10.1093/pubmed/fdq009) PMID: [20202981](https://pubmed.ncbi.nlm.nih.gov/20202981/)
32. Mathew P, Elting L, Cooksley C, Owen S, Lin J. Cancer in an incarcerated population. *Cancer*. 2005; 104(10):2197–204. doi: [10.1002/cncr.21468](https://doi.org/10.1002/cncr.21468) PMID: [16206295](https://pubmed.ncbi.nlm.nih.gov/16206295/)
33. Baillargeon J, Snyder N, Soloway RD, Paar D, Baillargeon G, Spaulding AC, et al. Hepatocellular carcinoma prevalence and mortality in a male state prison population. *Public health reports*. 2009; 124(1):120–6. PMID: [19413034](https://pubmed.ncbi.nlm.nih.gov/19413034/)
34. Zlotorzynska M, Spaulding AC, Messina LC, Coker D, Ward K, Easley K, et al. Retrospective cohort study of cancer incidence and mortality by HIV status in a Georgia, USA, prisoner cohort during the HAART era. *BMJ open*. 2016; 6(4):e009778. doi: [10.1136/bmjopen-2015-009778](https://doi.org/10.1136/bmjopen-2015-009778) PMID: [27067888](https://pubmed.ncbi.nlm.nih.gov/27067888/)

35. Binswanger IA, Blatchford PJ, Mueller SR, Stern MF. Mortality after prison release: opioid overdose and other causes of death, risk factors, and time trends from 1999 to 2009. *Annals of internal medicine*. 2013; 159(9):592–600. doi: [10.7326/0003-4819-159-9-201311050-00005](https://doi.org/10.7326/0003-4819-159-9-201311050-00005) PMID: [24189594](https://pubmed.ncbi.nlm.nih.gov/24189594/)
36. Binswanger IA, Stern MF, Deyo RA, Heagerty PJ, Cheadle A, Elmore JG, et al. Release from prison—a high risk of death for former inmates. *N Engl J Med*. 2007; 356(2):157–65. Epub 2007/01/12. doi: [10.1056/NEJMsa064115](https://doi.org/10.1056/NEJMsa064115) PMID: [17215533](https://pubmed.ncbi.nlm.nih.gov/17215533/)
37. Spaulding AC, Seals RM, McCallum VA, Perez SD, Brzozowski AK, Steenland NK. Prisoner survival inside and outside of the institution: implications for health-care planning. *Am J Epidemiol*. 2011; 173(5):479–87. Epub 2011/01/18. doi: [10.1093/aje/kwq422](https://doi.org/10.1093/aje/kwq422) PMID: [21239522](https://pubmed.ncbi.nlm.nih.gov/21239522/)
38. Kouyoumdjian FG, Kiefer L, Wobeser W, Gonzalez A, Hwang SW. Mortality over 12 years of follow-up in people admitted to provincial custody in Ontario: a retrospective cohort study. *CMAJ open*. 2016; 4(2):E153–61. doi: [10.9778/cmajo.20150098](https://doi.org/10.9778/cmajo.20150098) PMID: [27398358](https://pubmed.ncbi.nlm.nih.gov/27398358/)
39. Rosen DL, Schoenbach VJ, Wohl DA. All-cause and cause-specific mortality among men released from state prison, 1980–2005. *American journal of public health*. 2008; 98(12):2278–84. doi: [10.2105/AJPH.2007.121855](https://doi.org/10.2105/AJPH.2007.121855) PMID: [18923131](https://pubmed.ncbi.nlm.nih.gov/18923131/)
40. Rosen DL, Wohl DA, Schoenbach VJ. All-cause and cause-specific mortality among black and white North Carolina state prisoners, 1995–2005. *Annals of epidemiology*. 2011; 21(10):719–26. doi: [10.1016/j.annepidem.2011.04.007](https://doi.org/10.1016/j.annepidem.2011.04.007) PMID: [21737304](https://pubmed.ncbi.nlm.nih.gov/21737304/)
41. Harzke AJ, Baillargeon JG, Goodman KJ, Pruitt SL. Liver cancer mortality among male prison inmates in Texas, 1992–2003. *Preventive medicine*. 2009; 48(6):588–92. doi: [10.1016/j.ypmed.2009.03.011](https://doi.org/10.1016/j.ypmed.2009.03.011) PMID: [19289141](https://pubmed.ncbi.nlm.nih.gov/19289141/)
42. Stavrou E, Vajdic CM, Loxton D, Pearson SA. The validity of self-reported cancer diagnoses and factors associated with accurate reporting in a cohort of older Australian women. *Cancer epidemiology*. 2011; 35(6):e75–80. doi: [10.1016/j.canep.2011.02.005](https://doi.org/10.1016/j.canep.2011.02.005) PMID: [21474409](https://pubmed.ncbi.nlm.nih.gov/21474409/)
43. Chong N. IARC Technical Reports No. 32: Automated Data Collection in Cancer Registration: Computerized record linkage in cancer registries. In: International Agency for Research on Cancer, editor. Lyon, France: World Health Organization,; 1998.
44. World Health Organization. International Classification of Diseases for Oncology, 3rd Edition (ICD-O-3), 2013 [cited 2013 September 16]. <http://www.who.int/classifications/icd/adaptations/oncology/en/>.
45. Canadian Cancer Society. Canadian Cancer Statistics 2015. 2015 Contract No.: May 11.
46. Statistics Canada. CANSIM 2016 [cited 2016 May 11]. <http://www5.statcan.gc.ca/cansim/>.
47. Szklo M, Nieto F.J. *Epidemiology: Beyond the Basics*. Sudbury, MA: Jones and Bartlett Publishers; 2007.
48. Canadian Institutes of Health Research NSaERCoC, Social Sciences and Humanities Research Council of Canada, . Tri-Council Policy Statement: Ethical Conduct for Research Involving Humans 2014. 2014.
49. Hagggar FA, Boushey RP. Colorectal cancer epidemiology: incidence, mortality, survival, and risk factors. *Clin Colon Rectal Surg*. 2009; 22(4):191–7. doi: [10.1055/s-0029-1242458](https://doi.org/10.1055/s-0029-1242458) PMID: [21037809](https://pubmed.ncbi.nlm.nih.gov/21037809/)
50. Johnson CM, Wei C, Ensor JE, Smolenski DJ, Amos CI, Levin B, et al. Meta-analyses of colorectal cancer risk factors. *Cancer Causes Control*. 2013; 24(6):1207–22. doi: [10.1007/s10552-013-0201-5](https://doi.org/10.1007/s10552-013-0201-5) PMID: [23563998](https://pubmed.ncbi.nlm.nih.gov/23563998/)
51. McPherson K, Steel CM, Dixon JM. ABC of breast diseases. Breast cancer-epidemiology, risk factors, and genetics. *Bmj*. 2000; 321(7261):624–8. PMID: [10977847](https://pubmed.ncbi.nlm.nih.gov/10977847/)
52. Gann PH. Risk factors for prostate cancer. *Rev Urol*. 2002; 4 Suppl 5:S3–S10.
53. International Agency for Research on Cancer. IARC Monographs on the Evaluation of Carcinogenic Risks to Humans: List of Classifications 2016 [cited 2016 May 20]. [http://monographs.iarc.fr/ENG/Classification/latest\\_classif.php](http://monographs.iarc.fr/ENG/Classification/latest_classif.php).
54. Binswanger IA, White MC, Perez-Stable EJ, Goldenson J, Tulskey JP. Cancer screening among jail inmates: frequency, knowledge, and willingness. *American journal of public health*. 2005; 95(10):1781–7. doi: [10.2105/AJPH.2004.052498](https://doi.org/10.2105/AJPH.2004.052498) PMID: [16186455](https://pubmed.ncbi.nlm.nih.gov/16186455/)
55. Nijhawan AE, Salloway R, Nunn AS, Poshkus M, Clarke JG. Preventive healthcare for underserved women: results of a prison survey. *Journal of women's health*. 2010; 19(1):17–22. doi: [10.1089/jwh.2009.1469](https://doi.org/10.1089/jwh.2009.1469) PMID: [20088654](https://pubmed.ncbi.nlm.nih.gov/20088654/)
56. Martin RE. Would female inmates accept Papanicolaou smear screening if it was offered to them during their incarceration? *CMAJ: Canadian Medical Association journal = journal de l'Association medicale canadienne*. 2000; 162(5):657–8. PMID: [10738451](https://pubmed.ncbi.nlm.nih.gov/10738451/)
57. Plugge E, Fitzpatrick R. Factors affecting cervical screening uptake in prisoners. *J Med Screen*. 2004; 11(1):48–9. PMID: [15006115](https://pubmed.ncbi.nlm.nih.gov/15006115/)

58. Elwood Martin R, Hislop TG, Grams GD, Calam B, Jones E, Moravan V. Evaluation of a cervical cancer screening intervention for prison inmates. *Canadian journal of public health = Revue canadienne de sante publique*. 2004; 95(4):285–9. PMID: [15362473](#)
59. Clarke JG, Stein LA, Martin RA, Martin SA, Parker D, Lopes CE, et al. Forced smoking abstinence: not enough for smoking cessation. *JAMA internal medicine*. 2013; 173(9):789–94. doi: [10.1001/jamainternmed.2013.197](#) PMID: [23567902](#)
60. Cancer Care Ontario. Ontario Cancer Registry 2012 [cited 2013 October 25]. <https://www.cancercare.on.ca/ocs/csurv/stats/oct/>.
61. Nishri D. The Ontario Cancer Registry and its Data Quality 2011 [cited 2013 October 25]. <http://www.apheo.ca/resources/indicators/OCRitsdataqualityNishriFeb2011.pdf>.
